# Supplementary material
Source: HighWire-hosted journal article supplement (https://drc.bmj.com/content/8/2/e001351)
Supplement: inline-supplementary-material-1 [file inline-supplementary-material-1.pdf]

**Table S1. Preoperative characteristics of diabetes patients with and without use of metformin (before matching by propensity score)**

|                         | No metformin<br>(N=322995) |        | Metformin<br>(N=153943) |        | p-value |
|-------------------------|----------------------------|--------|-------------------------|--------|---------|
|                         | n                          | (%)    | n                       | (%)    |         |
| Sex                     |                            |        |                         |        | 0.0088  |
| Female                  | 163216                     | (50.5) | 77166                   | (50.1) |         |
| Male                    | 159779                     | (49.5) | 76777                   | (49.9) |         |
| Age, years              |                            |        |                         |        | <0.0001 |
| 20-29                   | 4397                       | (1.4)  | 2625                    | (1.7)  |         |
| 30-39                   | 14356                      | (4.4)  | 7032                    | (4.6)  |         |
| 40-49                   | 28949                      | (9.0)  | 15227                   | (9.9)  |         |
| 50-59                   | 67947                      | (21.0) | 33653                   | (21.9) |         |
| 60-69                   | 84246                      | (26.1) | 42072                   | (27.3) |         |
| 70-79                   | 82288                      | (25.5) | 37209                   | (24.2) |         |
| ≥80                     | 40812                      | (12.6) | 16125                   | (10.5) |         |
| Low income              |                            |        |                         |        | <0.0001 |
| No                      | 313376                     | (97.0) | 148856                  | (96.7) |         |
| Yes                     | 9619                       | (3.0)  | 5087                    | (3.3)  |         |
| Volume of hospital      |                            |        |                         |        | <0.0001 |
| Low                     | 78121                      | (24.2) | 59569                   | (38.7) |         |
| Moderate                | 113302                     | (35.1) | 49457                   | (32.1) |         |
| High                    | 131572                     | (40.7) | 44917                   | (29.2) |         |
| Medical conditions      |                            |        |                         |        |         |
| Hypertension            | 115407                     | (35.7) | 53901                   | (35.0) | <0.0001 |
| Mental disorders        | 63701                      | (19.7) | 31693                   | (20.6) | <0.0001 |
| Ischemic heart disease  | 51635                      | (16.0) | 22382                   | (14.5) | <0.0001 |
| COPD                    | 25766                      | (8.0)  | 12383                   | (8.0)  | 0.4274  |
| Hyperlipidemia          | 25122                      | (7.8)  | 10453                   | (6.8)  | <0.0001 |
| Liver cirrhosis         | 15342                      | (4.8)  | 7745                    | (5.0)  | <0.0001 |
| Heart failure           | 17102                      | (5.3)  | 7058                    | (4.6)  | <0.0001 |
| Alcohol-related illness | 8597                       | (2.7)  | 5055                    | (3.3)  | <0.0001 |
| Parkinson's disease     | 7269                       | (2.3)  | 3469                    | (2.3)  | 0.9491  |
| Renal dialysis          | 21595                      | (6.7)  | 3008                    | (2.0)  | <0.0001 |
| Types of surgery        |                            |        |                         |        | <0.0001 |
| Skin                    | 7142                       | (2.2)  | 3310                    | (2.2)  |         |
| Breast                  | 3810                       | (1.2)  | 2160                    | (1.4)  |         |
| Musculoskeletal         | 102820                     | (31.8) | 49419                   | (32.1) |         |

|                                       |        |        |        |        |         |
|---------------------------------------|--------|--------|--------|--------|---------|
| Respiratory                           | 11476  | (3.6)  | 6161   | (4.0)  |         |
| Cardiovascular                        | 21098  | (6.5)  | 6921   | (4.5)  |         |
| Digestive                             | 65490  | (20.3) | 32287  | (21.0) |         |
| Kidney, ureter, bladder               | 29854  | (9.2)  | 15121  | (9.8)  |         |
| Delivery, CS, abortion                | 8600   | (2.7)  | 2037   | (1.3)  |         |
| Neurosurgery                          | 36972  | (11.5) | 19957  | (13.0) |         |
| Eye                                   | 6870   | (2.1)  | 2925   | (1.9)  |         |
| Others                                | 28863  | (8.9)  | 13645  | (8.9)  |         |
| Types of anaesthesia                  |        |        |        |        | <0.0001 |
| General                               | 233799 | (72.4) | 116561 | (75.7) |         |
| Epidural or Spinal                    | 89196  | (27.6) | 37382  | (24.3) |         |
| CCI score                             |        |        |        |        | <0.0001 |
| 1                                     | 141046 | (43.7) | 68671  | (44.6) |         |
| 2                                     | 62434  | (19.3) | 30354  | (19.7) | 1.00    |
| 3                                     | 61294  | (19.0) | 26103  | (17.0) |         |
| ≥4                                    | 58221  | (18.0) | 28815  | (18.7) |         |
| Chronic kidney disease                | 38698  | (12.0) | 9448   | (6.1)  | <0.0001 |
| Prior diabetes hospitalization        | 22637  | (7.0)  | 8544   | (5.6)  | <0.0001 |
| Inadequate control for diabetes       | 68390  | (21.2) | 32451  | (21.1) | 0.4581  |
| Diabetes-related ketoacidosis         | 4784   | (1.5)  | 2115   | (1.4)  | 0.0037  |
| Diabetes-related coma                 | 7114   | (2.2)  | 2675   | (1.7)  | <0.0001 |
| Diabetes-related renal manifestations | 58799  | (18.2) | 22197  | (14.4) | <0.0001 |
| Diabetes-related eye involvement      | 54806  | (17.0) | 23504  | (15.3) | <0.0001 |
| Diabetes-related PCD                  | 20019  | (6.2)  | 8521   | (5.5)  | <0.0001 |
| Type I diabetes                       | 9622   | (3.0)  | 2504   | (1.6)  | <0.0001 |
| Preoperative use of insulin           | 34292  | (10.6) | 21232  | (13.8) | <0.0001 |
| Use of AGIs                           | 67245  | (20.8) | 34407  | (22.4) | <0.0001 |
| Use of DPP-4                          | 42948  | (13.3) | 37969  | (24.7) | <0.0001 |
| Use of meglitinides                   | 59605  | (18.5) | 27549  | (17.9) | <0.0001 |
| Use of sulfonylureas                  | 201982 | (62.5) | 116566 | (75.7) | <0.0001 |

AGIs, alpha-glucosidase inhibitors; DPP-4, Dipeptidyl peptidase 4 inhibitors
